# Supplementary material for: Synthesis of kinase inhibitors containing a pentafluorosulfanyl moiety
Source: Royal Society of Chemistry journal article supplement (doi:10.1039/c7ob02289a), 2017-01-01

## **Synthesis of kinase inhibitors containing a pentafluorosulfanyl moiety.**

Supojjane Sansook<sup>a</sup>, Cory A. Ocasio<sup>a</sup>, Iain J. Day<sup>a</sup>, Graham J. Tizzard<sup>b</sup>, Simon J. Coles<sup>b</sup>, Oleg Fedorov<sup>c</sup>, James M. Bennett<sup>c</sup>, Jonathan M. Elkins<sup>c,d</sup>, John Spencer<sup>a,\*</sup>

<sup>a</sup>*Dept of Chemistry, School of Life Sciences, University of Sussex, Falmer, BN1 9QJ, UK.*

<sup>b</sup>UK National Crystallography Service, Chemistry, University of Southampton, Highfield, Southampton, SO17 1BJ, U.K. <sup>c</sup>Structural Genomics Consortium, Nuffield Department of Clinical Medicine, University of Oxford, Oxford, OX3 7DQ, UK. <sup>d</sup>Structural Genomics Consortium, Universidade Estadual de Campinas, Campinas, SP 13083-886, Brazil

<sup>e</sup>Structural Genomics Consortium, Universidade Estadual de Campinas, Campinas, SP 13083-886, Brazil.

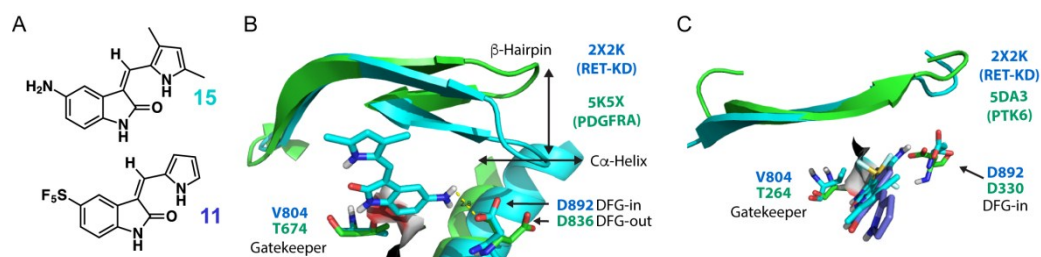

**Figure S1.** Structural studies comparing binding modes of methylidene indolinone-based kinase inhibitors **11** and **15** (A) with active and inactive kinase domains. Compound **15** (A) was co-crystallised with RET kinase domain (B, PDB: 2X2K) forcing a “DFG-in” kinase conformation. This **15**-bound RET conformation was aligned with the PDGFRA crystal structure (B, PDB: 5K5X) revealing gross conformational shifts around the ATP-binding pocket, particularly between the RET and PDGFRA b-hairpin and Ca-helix (B), and compared to RET, the PDGFRA DFG catalytic-motif aspartic acid is pointing outside of the ATP-binding pocket; evidence for an inactive kinase conformation. Compound **11** displayed the greatest potency in the series against PDGFRA, a receptor tyrosine kinase containing a threonine gatekeeper. RET has a valine gatekeeper, and thus PTK6 (C, PDB: 5DA3), a non-receptor tyrosine kinase containing a threonine gatekeeper, was selected for docking studies with compound **10** - **11** (Fig. 5, main article) to ascertain the molecular determinants for the superior potency of **11** vs **10**. The alignment between **15**-bound RET and **11**-docked PTK6 (C) reveals very similar binding modes between compounds **11** and **15** and an agreement in PTK6 and RET kinase conformation, both in the active state.

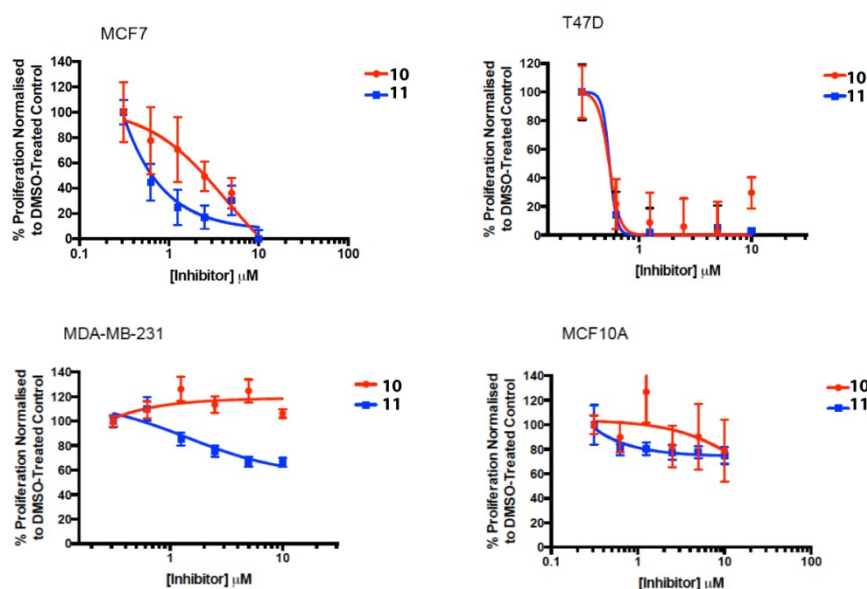

**Figure S2.** Proliferation assays. Dose-dependent inhibition of MCF7, T47D MDA-BM-231 and MCF10A cells by compounds **10** and **11**.

Fig S3. NMRs

**(Z)-3-((1H-Pyrrol-2-yl)methylene)-5-pentafluorosulfonylindoline-2-one**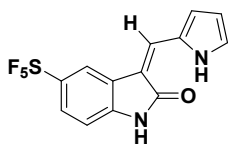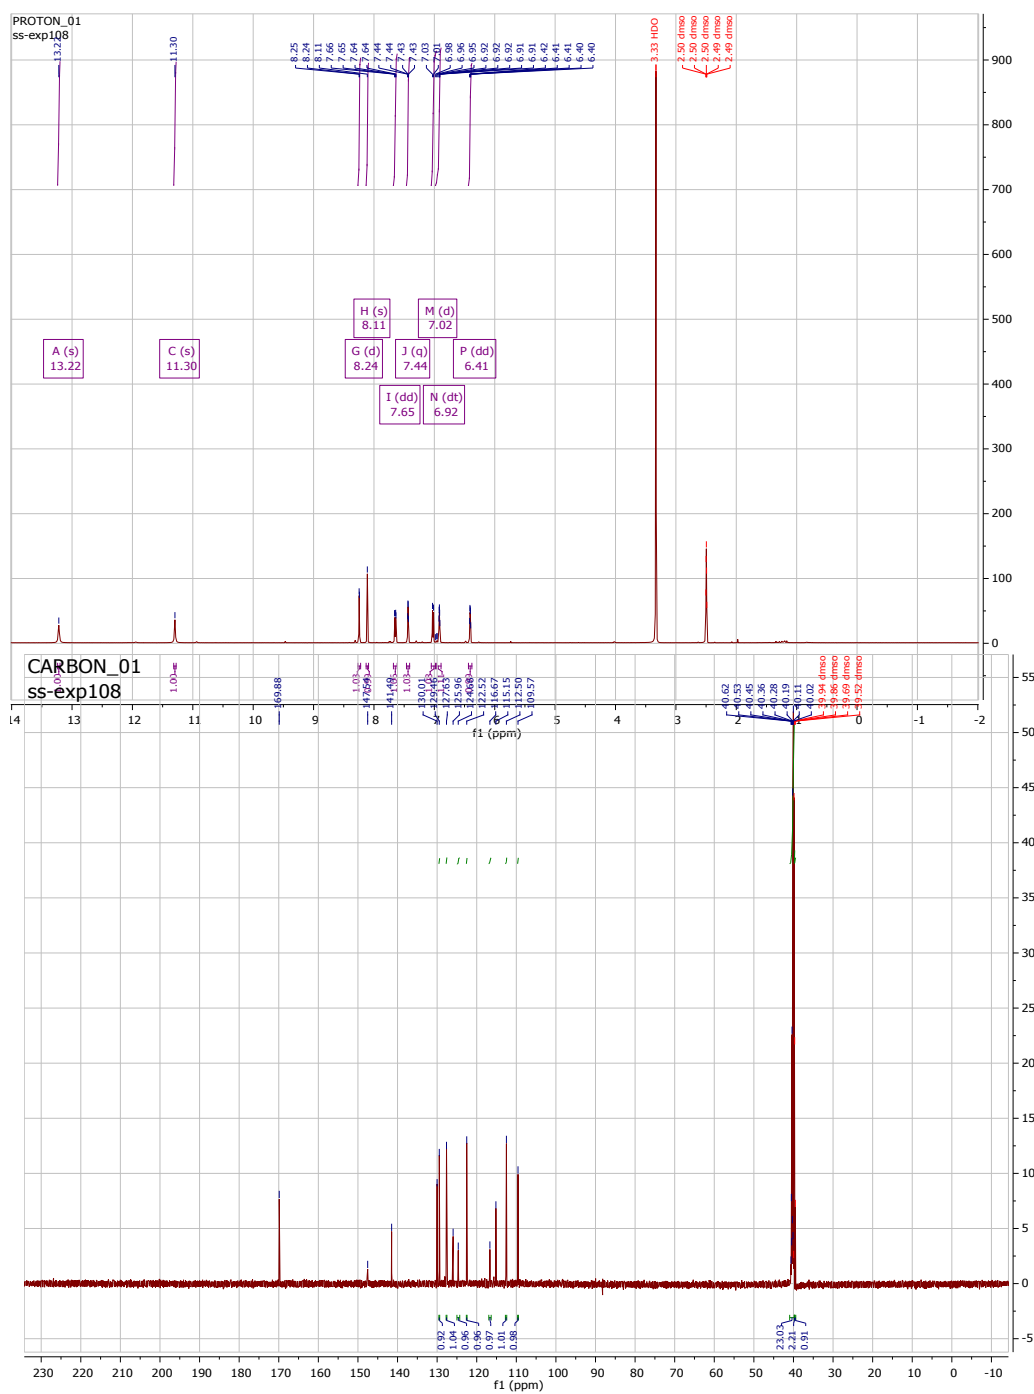

**(Z)-3-((1H-Pyrrol-2-yl)methylene)-6-pentafluorosulfanylindoline-2-one**

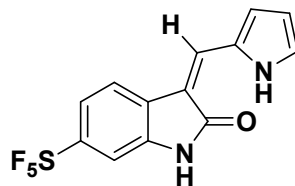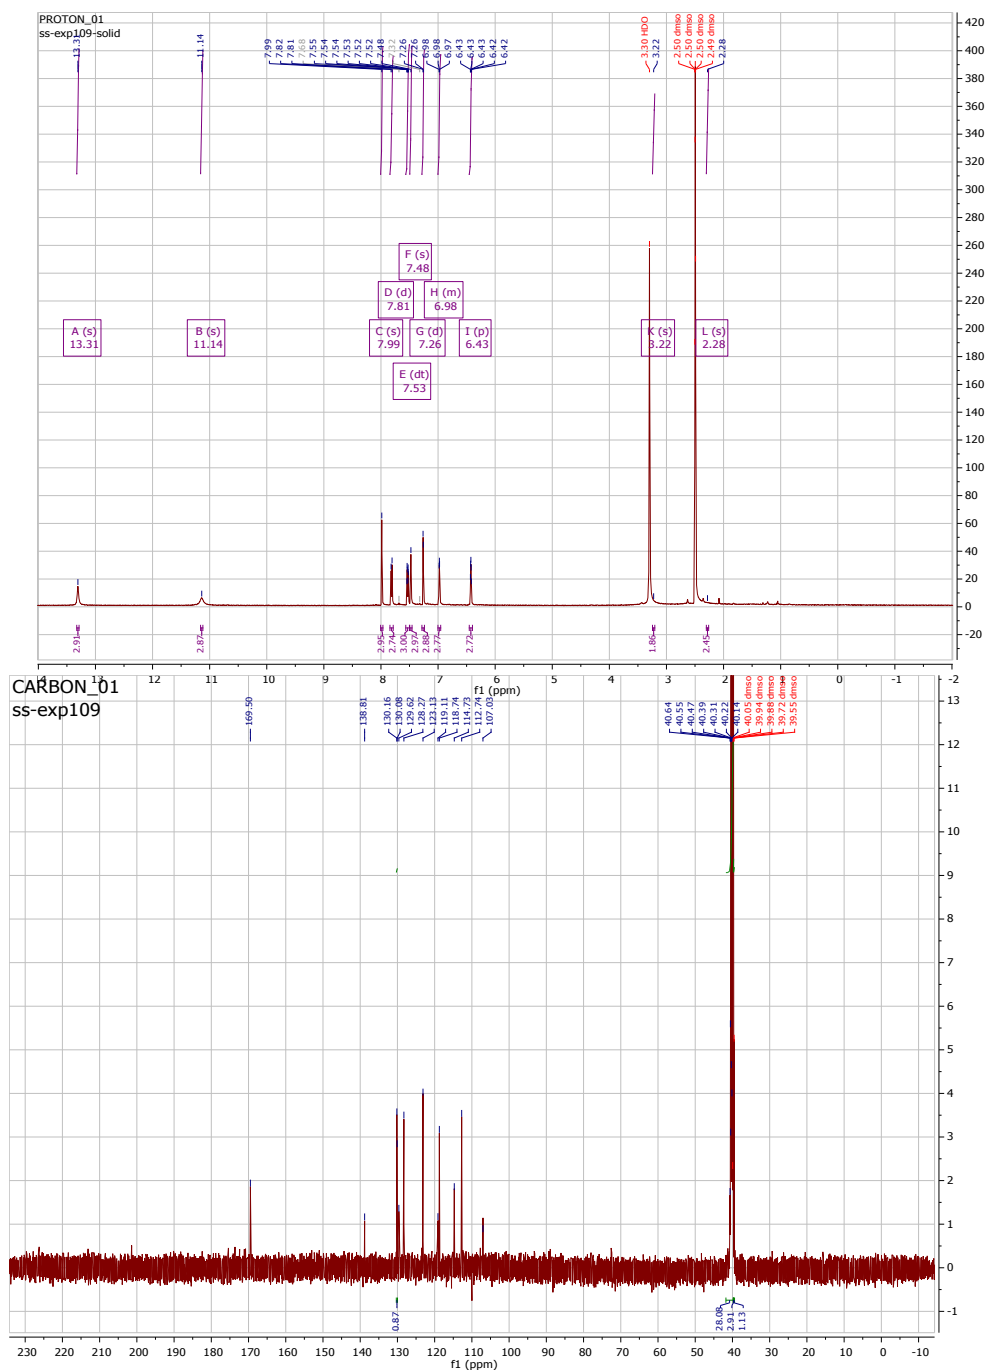

**(E)-5-Pentafluorosulfanyl-3-ferrocenylindolin-2-one**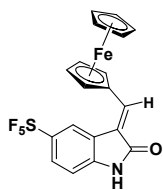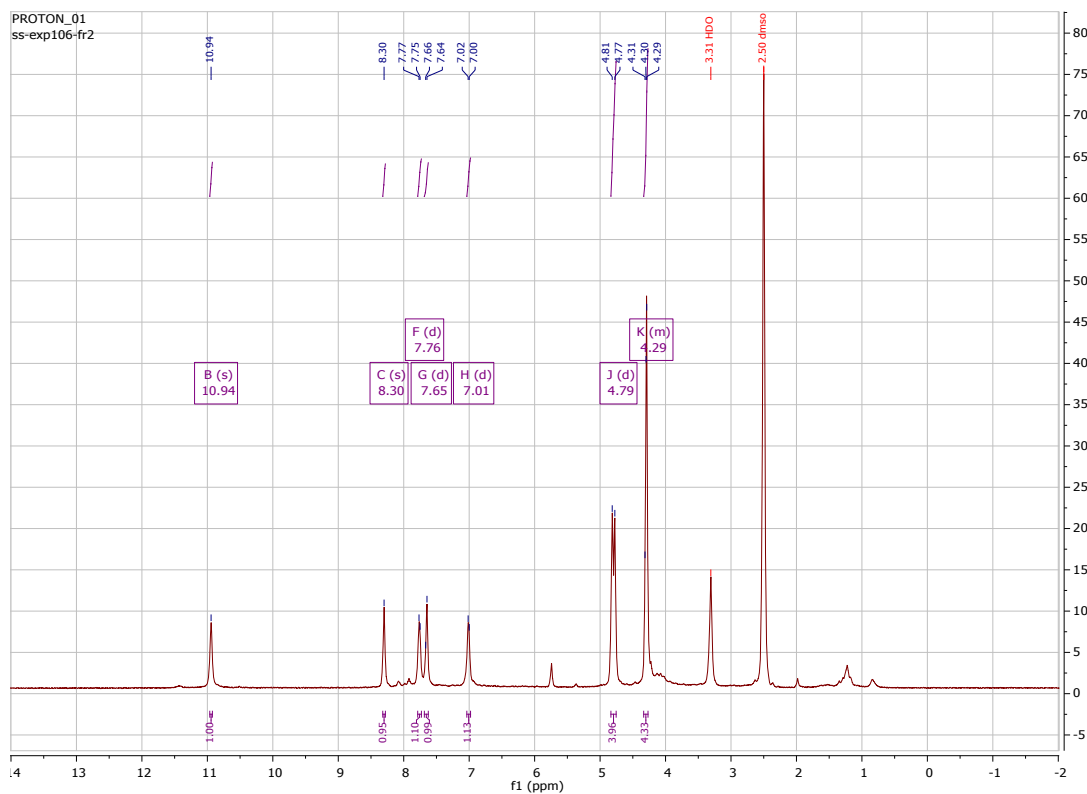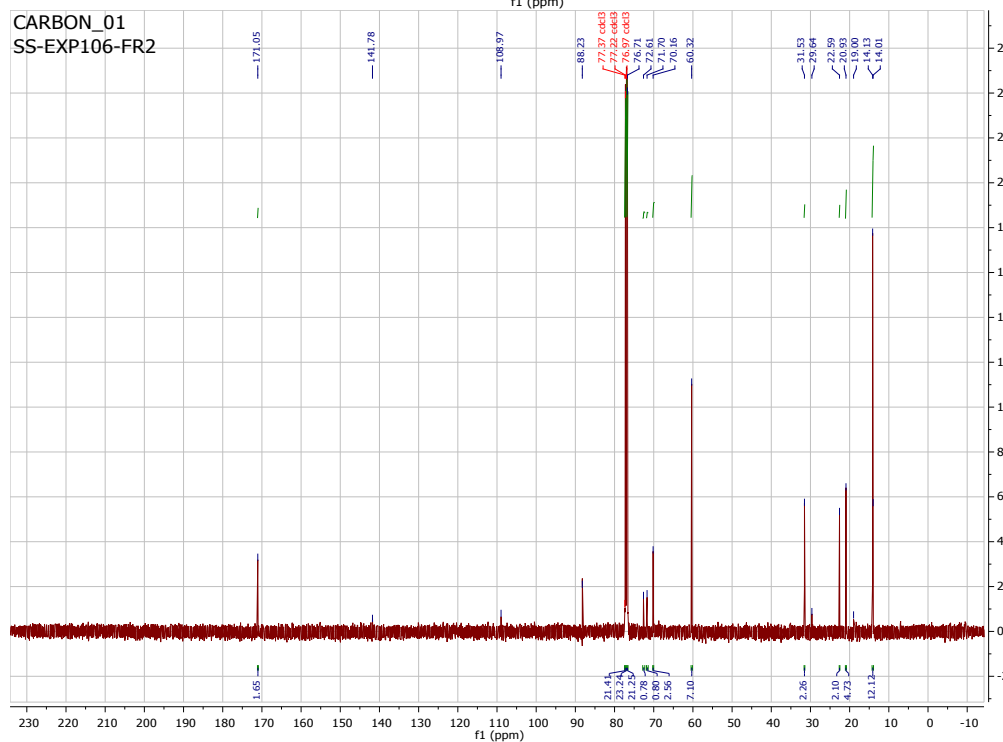**(Z)-5-Pentafluorosulfanyl-3-ferrocenylindolin-2-one**

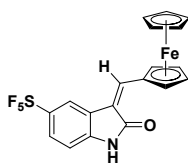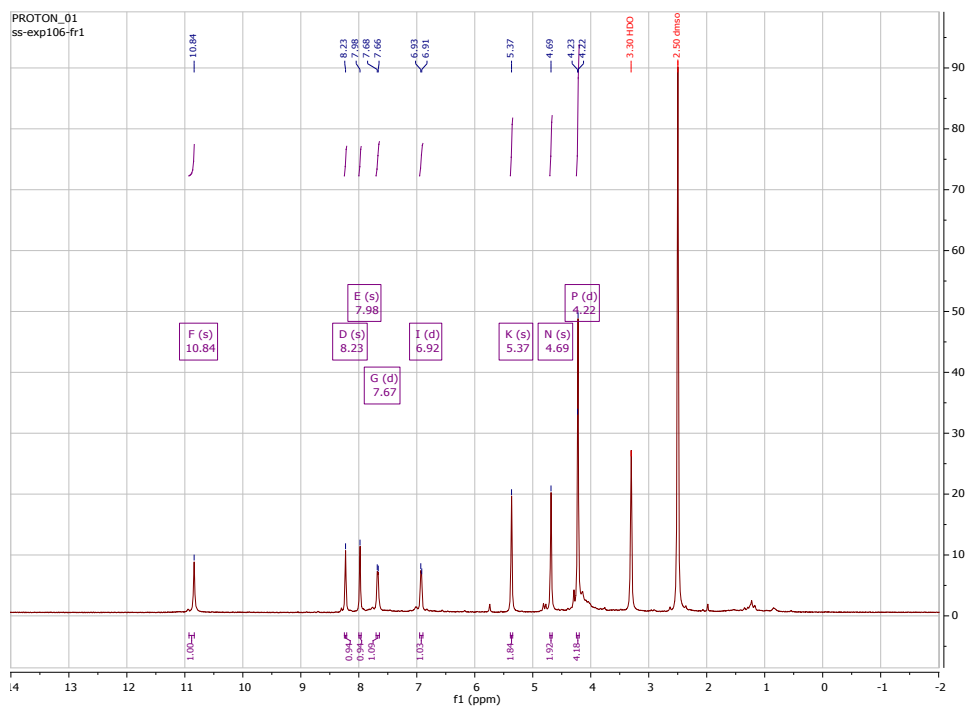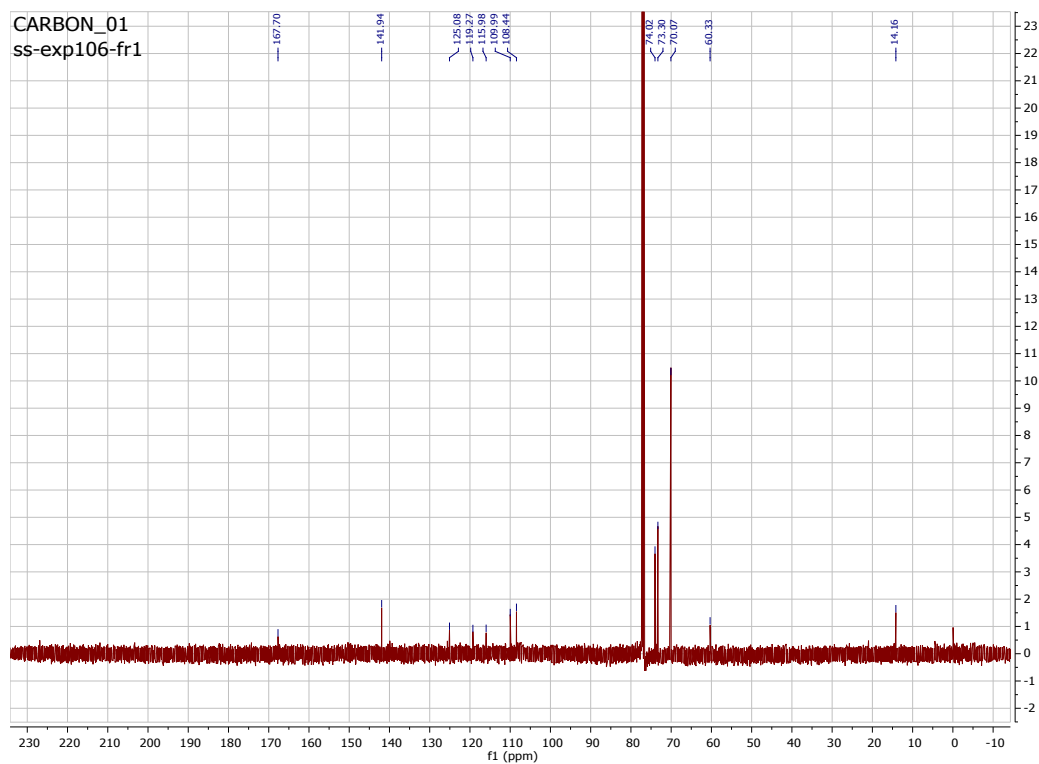

**(Z)-3-(2,4-dimethyl-5-((5-pentafluorosulfanyl-2-oxindolin-3-ylidene)methyl)-1H-pyrrol-3-yl)propanoic acid**

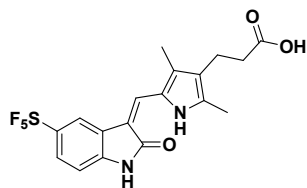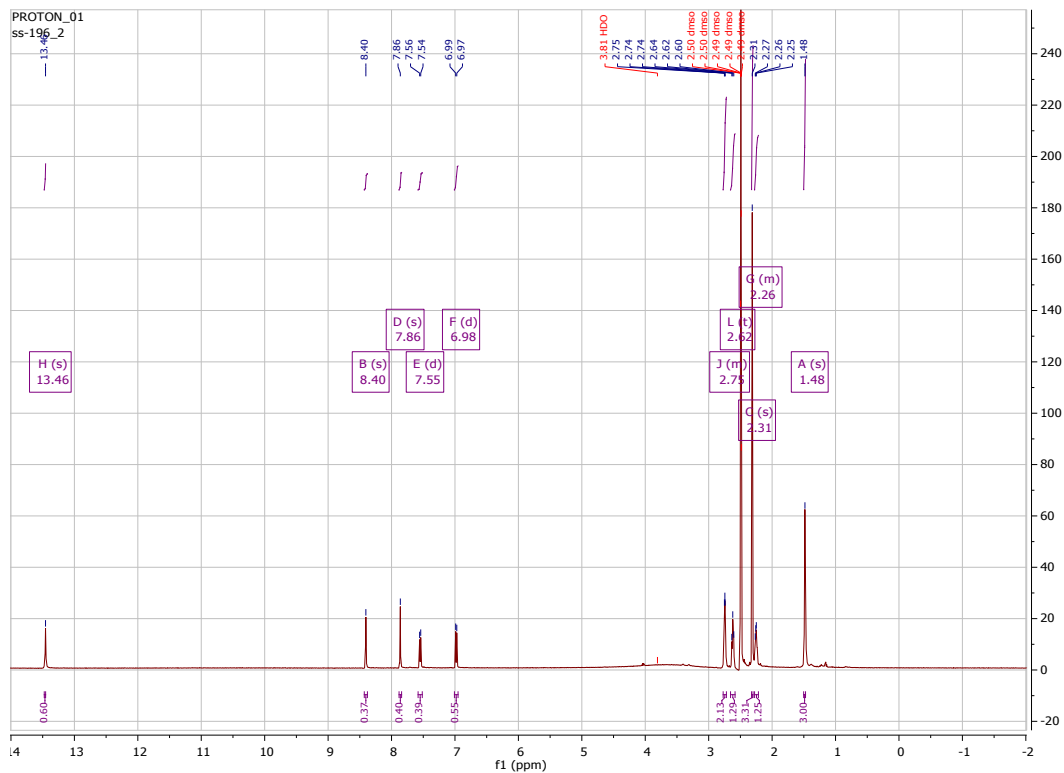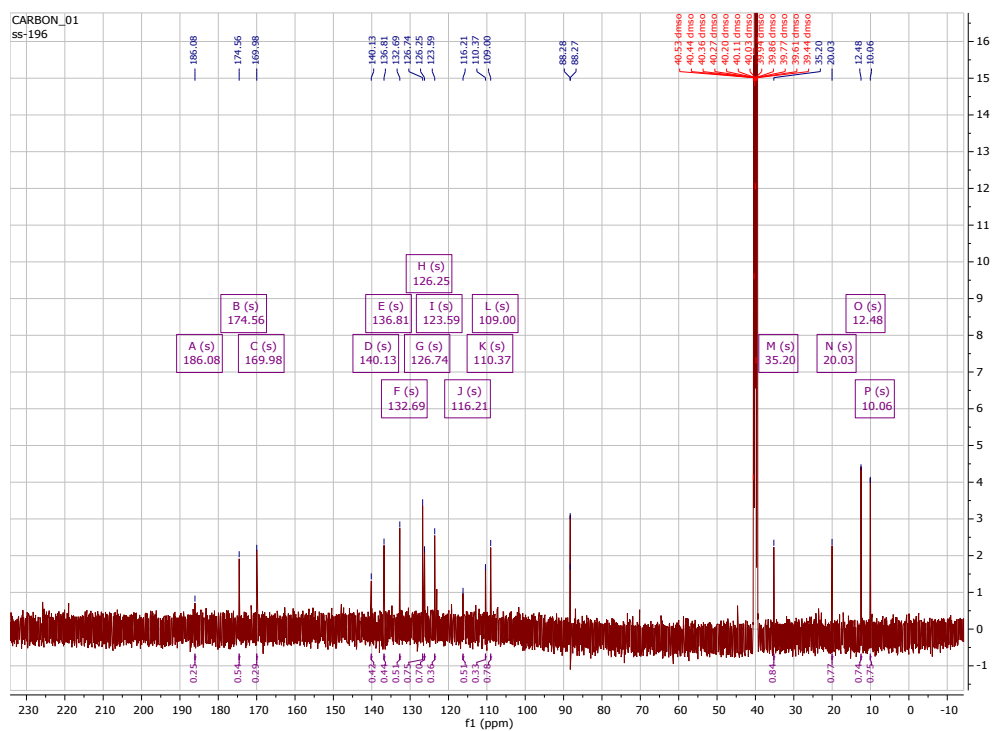

**(Z)-3-(2,4-dimethyl-5-((6-pentafluorosulfanyl-2-oxoindolin-3-ylidene)methyl)-1H-pyrrol-3-yl)propanoic acid**

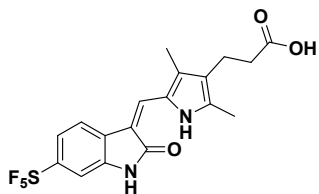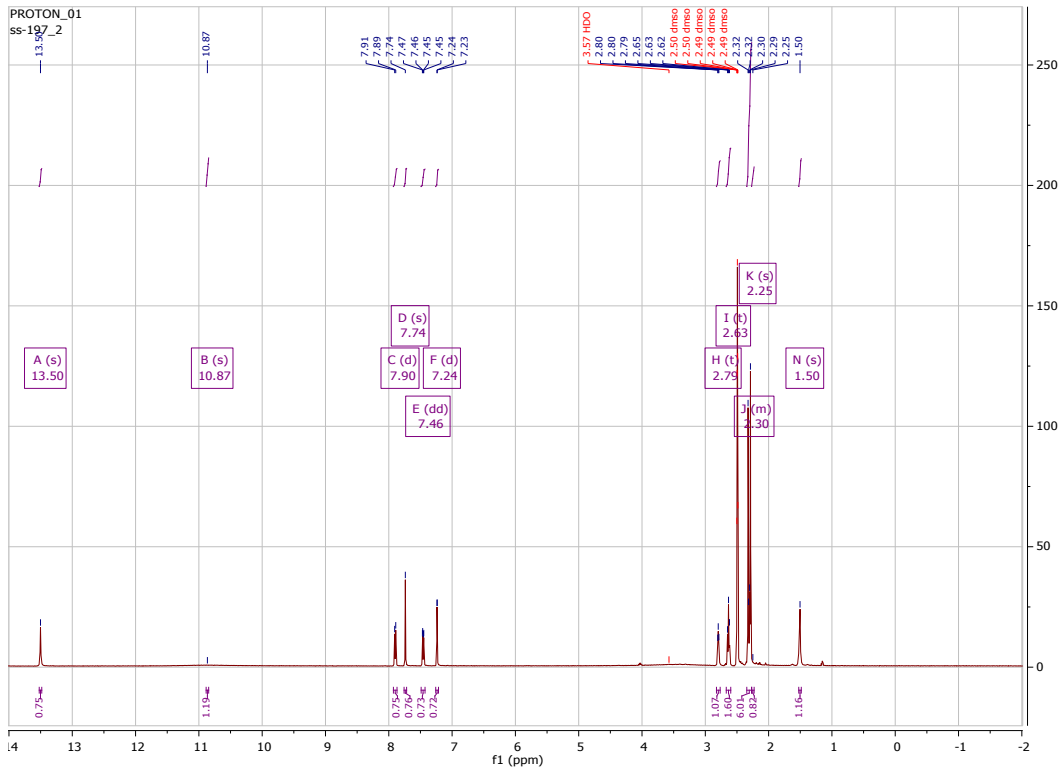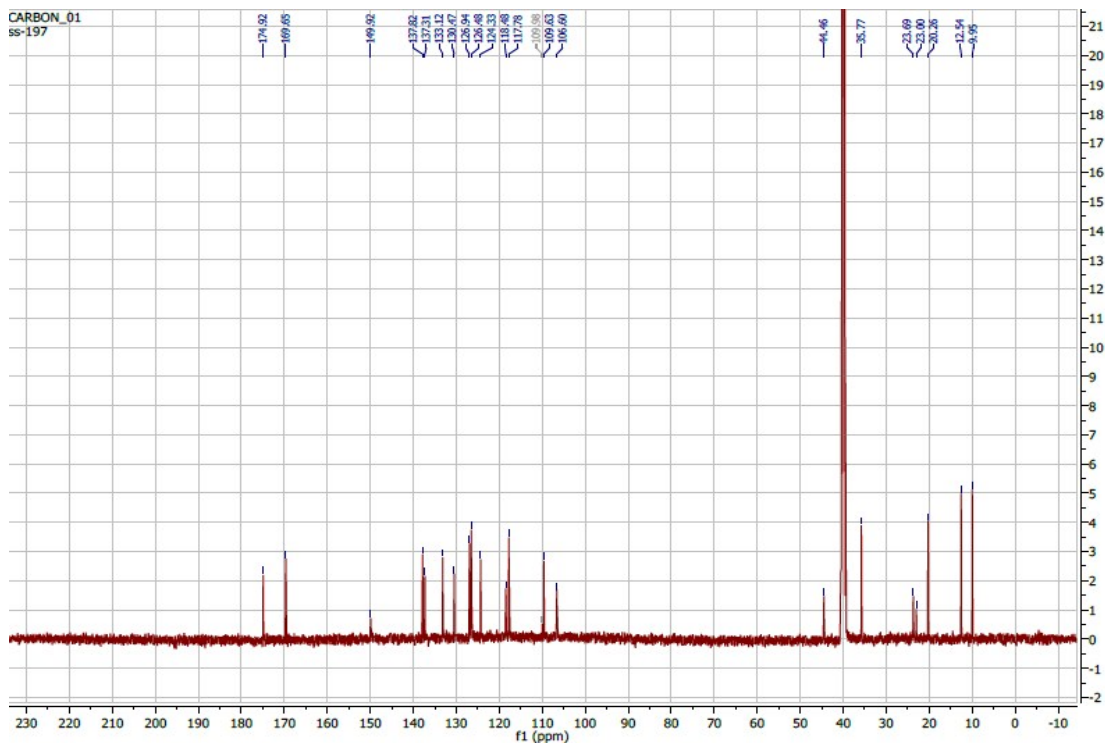



$^{19}\text{F}$ : (broad)

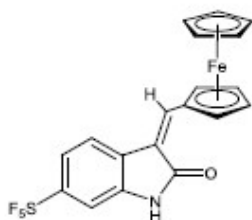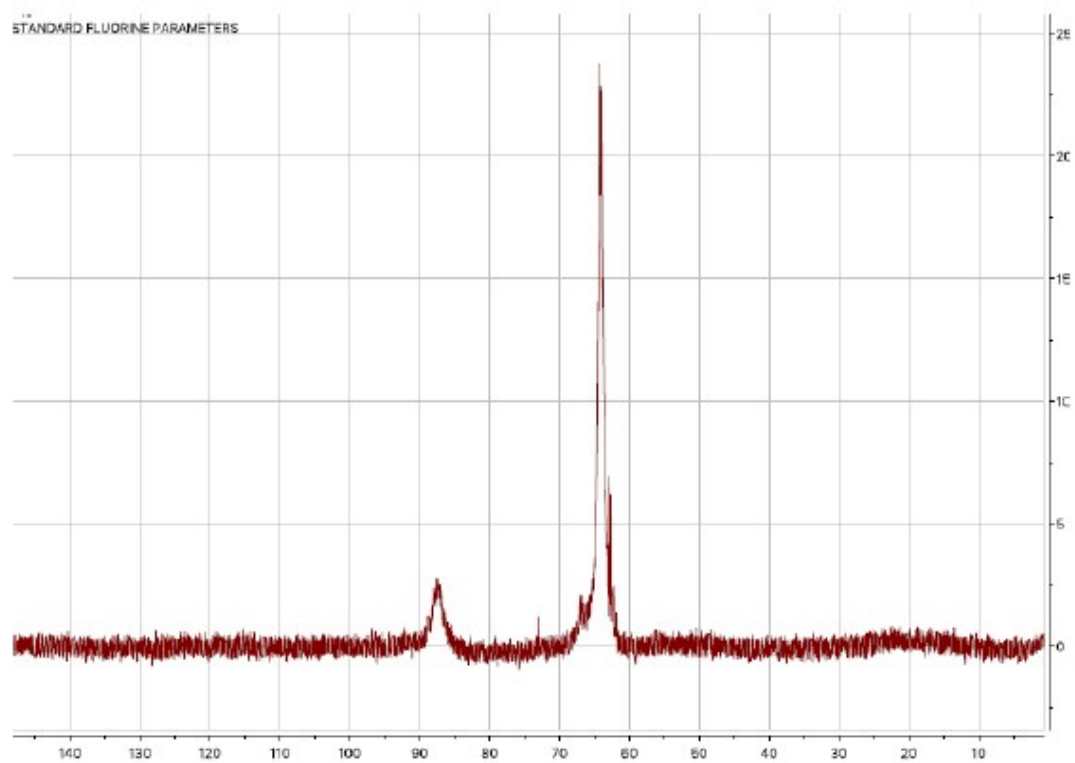

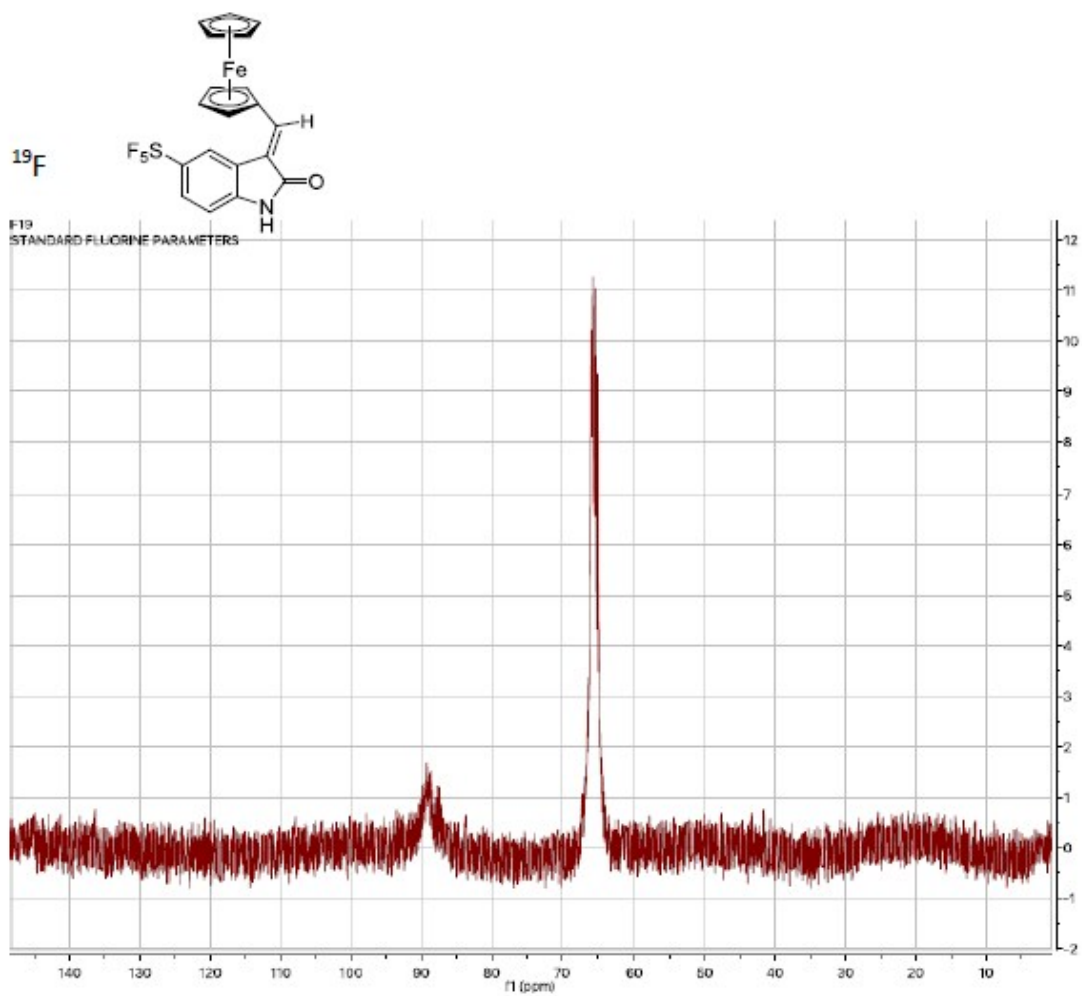

$^{19}\text{F}$ 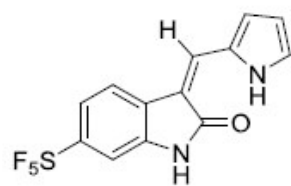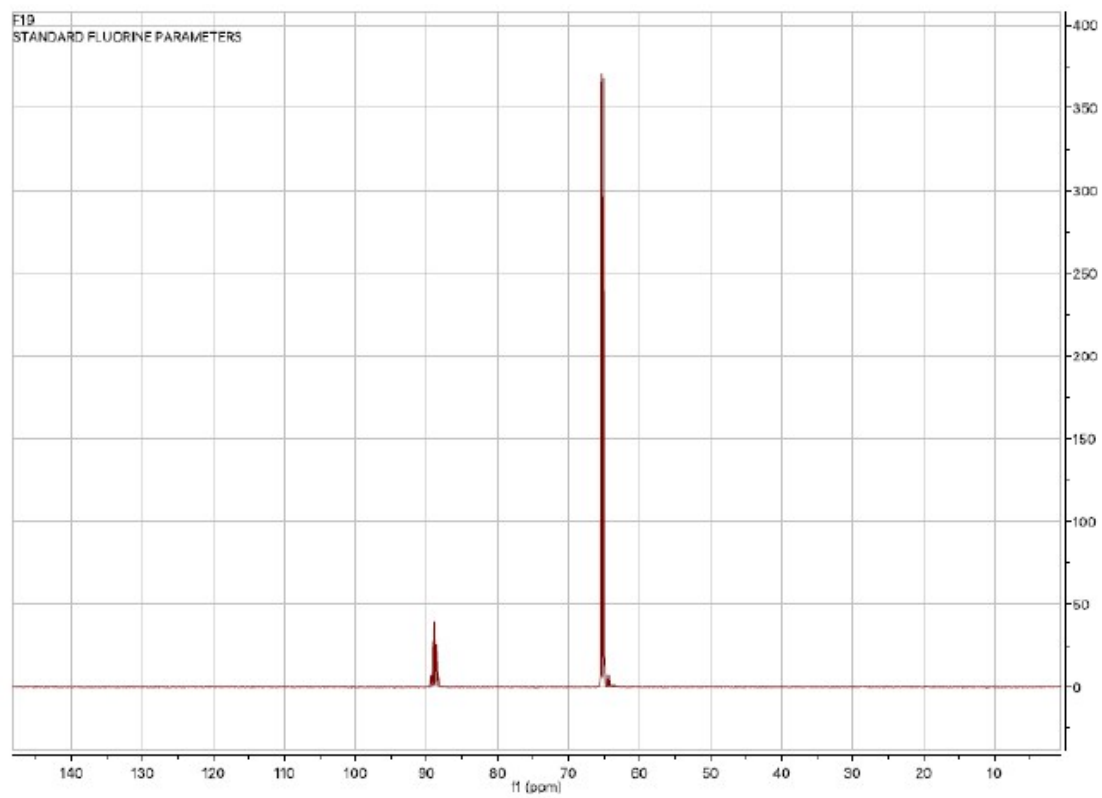

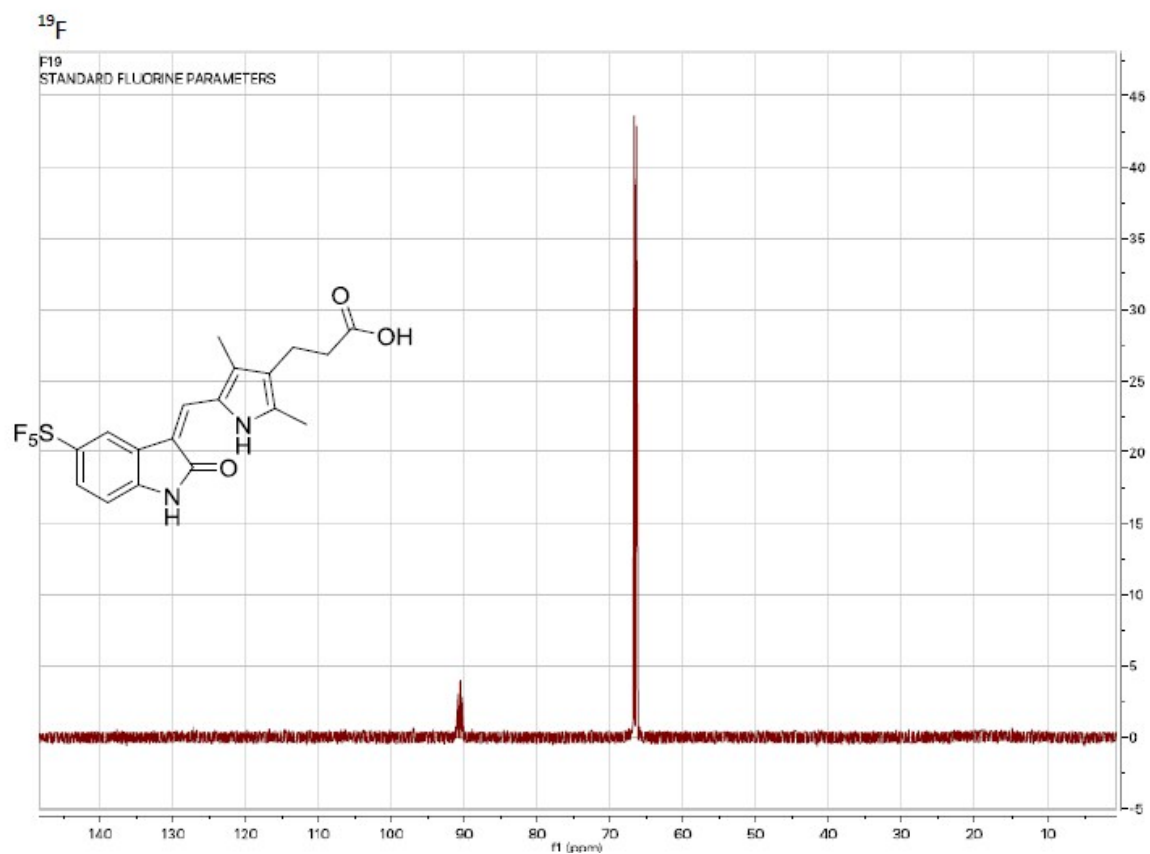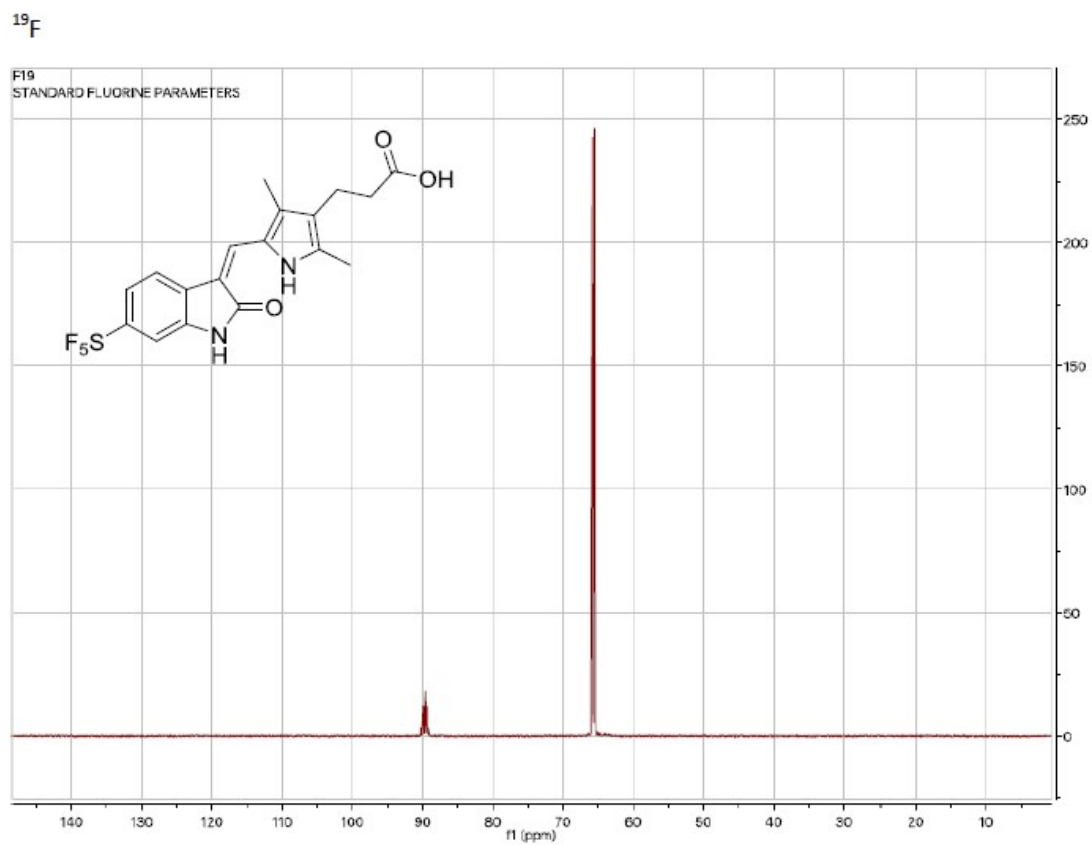

Supplement: c7ob02289a1.pdf [file c7ob02289a1.pdf]
